# Supplementary material for: Acceptability and Feasibility of a Sedentary Behavior Reduction Program during Pregnancy: A Semi-Experimental Study
Source: PubMed Central journal article supplement (PMC7712505; doi:10.3390/healthcare8040439), 2020-10-29
Supplement: healthcare-08-00439-s001.pdf [file healthcare-08-00439-s001.pdf]

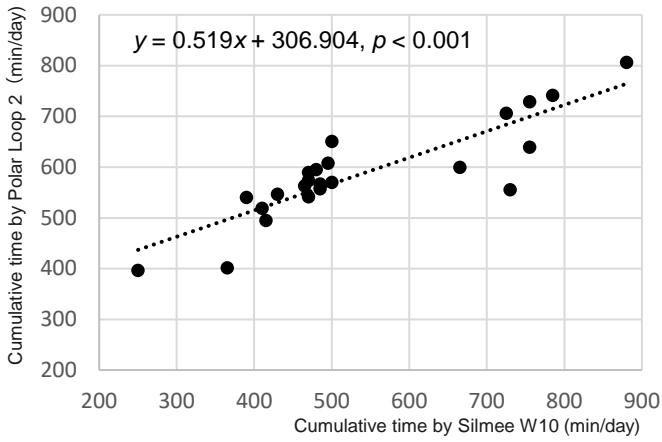

(a)

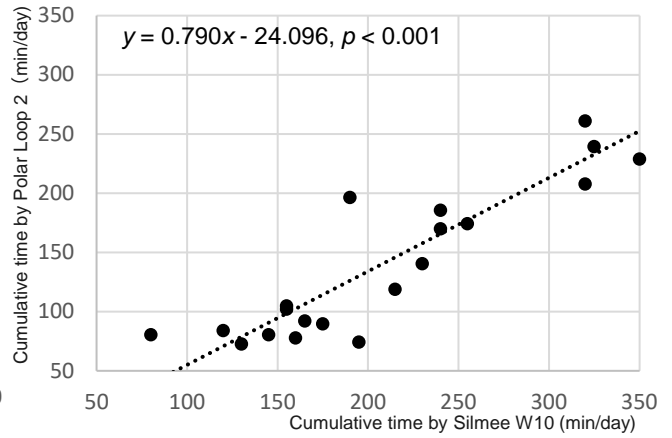

(b)

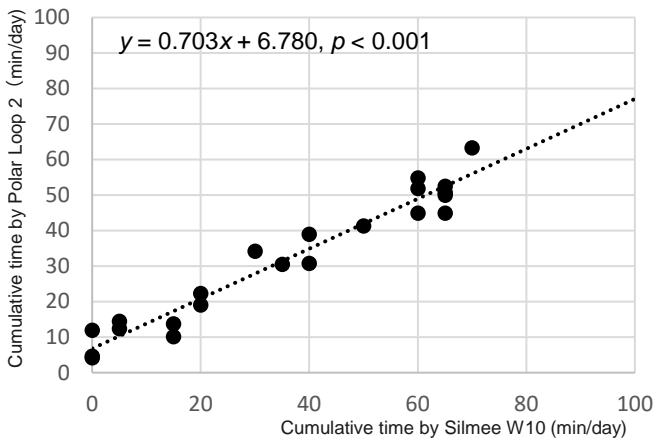

(c)

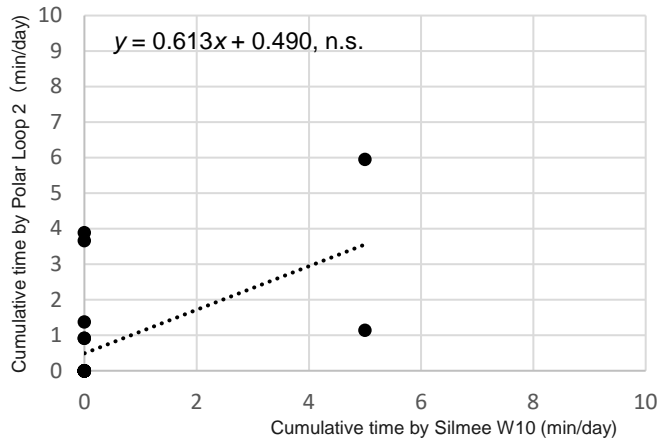

(d)

**Figure S1:** Scatter plots and linear regression equations for the simultaneous measurements from Silmee W10 and Polar Loop 2 : (a) SB, (b) light PA, (c) moderate PA, and (d) vigorous PA. PA, physical activity; SB, sedentary behavior.
